# Supplementary material for: Anthelmintic resistance in cyathostomin populations from horse yards in Italy, United Kingdom and Germany
Source: Springer Nature journal article supplement (doi:10.1186/1756-3305-2-s2-s2), 2009-01-01
Supplement: Additional file 1 [file 1756-3305-2-s2-s2-s1.pdf]

**Additional file 1**

**Mean percentages of faecal egg count reduction after treatment with fenbendazole (FBZ), pyrantel pamoate (PYR), ivermectin (IVM) and moxidectin (MOX) evaluated against cyathostomins in a total of 102 horse yards located in Germany, Italy and UK.**

The faecal egg count reductions (%) and respective 95% confidence intervals (CI) (set between 0 and 100%) were calculated using the Bootstreat programme using the formula  $FECR = 100 * (1 - \text{arithmetic mean of FEC post treatment} / \text{arithmetic mean of FEC per treatment})$  with 2000 repeats. H: treated horses in each yard; G: number of horses in each treatment group.

Red Values: *resistance present* (FECR <90% and LCL <90%)

Blue values: *resistance suspected* (FECR ≥90% and/or LCL <90%)

Black values: *no resistance* (FECR ≥90% and LCL >90%)

| Country | Yard ID | H/G  | FBZ | 95% CI | PYR | 95% CI | IVM | 95% CI | MOX | 95% CI |
|---------|---------|------|-----|--------|-----|--------|-----|--------|-----|--------|
| Germany | 1       | 20/5 | 79  | 23-100 | 94  | 76-100 | 100 |        | 100 |        |
|         | 3       | 20/5 | 28  | 0-93   | 90  | 51-100 | 93  | 75-100 | 100 |        |
|         | 4       | 20/5 | 0   | 0-51   | 100 |        | 100 |        | 100 |        |
|         | 5       | 12/4 |     |        | 100 |        | 100 |        | 100 |        |
|         | 7       | 16/4 | 46  | 44-100 | 83  | 44-100 | 100 |        | 100 |        |
|         | 8       | 16/4 | 0   | 0-53   | 100 |        | 100 |        | 100 |        |
|         | 9       | 16/4 | 31  | 0-100  | 100 |        | 100 |        | 100 |        |
|         | 10      | 16/4 | 100 |        | 92  | 43-100 | 100 |        | 100 |        |
|         | 11      | 12/4 |     |        | 83  | 42-100 | 100 |        | 100 |        |
|         | 13      | 20/5 | 25  | 0-97   | 100 |        | 100 |        | 100 |        |
|         | 14      | 16/4 | 43  | 0-76   | 100 |        | 100 |        | 100 |        |
|         | 15      | 20/5 | 89  | 72-100 | 84  | 64-99  | 100 |        | 100 |        |
|         | 16      | 16/4 | 100 |        | 100 |        | 100 |        | 100 |        |
|         | 18      | 12/4 |     |        | 100 |        | 100 |        | 100 |        |
|         | 19      | 20/5 | 30  | 0-100  | 100 |        | 100 |        | 97  | 88-100 |
|         | 21      | 20/5 | 44  | 0-90   | 64  | 0-100  | 100 |        | 100 |        |
|         | 23      | 12/4 |     |        | 100 |        | 100 |        | 100 |        |
|         | 24      | 12/4 |     |        | 100 |        | 100 |        | 100 |        |
|         | 27      | 12/4 |     |        | 95  | 70-100 | 100 |        | 100 |        |
|         | 30      | 12/4 |     |        | 100 |        | 100 |        | 100 |        |
| Italy   | B1      | 12/4 |     |        | 91  | 41-100 | 100 |        | 100 |        |
|         | B2      | 16/4 | 100 |        | 100 |        | 100 |        | 100 |        |
|         | B3      | 16/4 | 95  | 80-100 | 100 |        | 100 |        | 100 |        |
|         | B4      | 12/4 |     |        | 98  | 92-100 | 100 |        | 100 |        |
|         | B5      | 16/4 | 100 |        | 95  | 72-100 | 100 |        | 100 |        |
|         | B6      | 16/4 | 100 |        | 100 |        | 100 |        | 100 |        |
|         | P1      | 20/5 | 71  | 16-100 | 63  | 2-89   | 100 |        | 100 |        |
|         | P2      | 16/4 | 100 |        | 91  | 82-100 | 100 |        | 100 |        |
|         | P3      | 16/4 | 100 |        | 92  | 73-100 | 100 |        | 100 |        |
|         | P4      | 20/5 | 97  | 90-100 | 63  | 3-100  | 100 |        | 100 |        |

Parasites & Vectors 2(Suppl 2): S2  
 Additional file 1 (cont)

| Country | Yard ID | H/G  | FBZ    | 95% CI | PYR    | 95% CI | IVM | 95% CI | MOX | 95% CI |
|---------|---------|------|--------|--------|--------|--------|-----|--------|-----|--------|
| Italy   | P5      | 20/5 | 98     | 92-100 | 96     | 90-100 | 97  | 92-100 | 100 |        |
|         | P6      | 12/4 |        |        | 97     | 88-100 | 100 |        | 100 |        |
|         | P7      | 16/4 | 100    |        | 100    |        | 100 |        | 100 |        |
|         | P8      | 16/4 | 100    |        | 100    |        | 100 |        | 100 |        |
|         | C1      | 20/5 | 77     | 0-100  | 100    |        | 100 |        | 100 |        |
|         | C2      | 12/4 |        |        | 100    |        | 100 |        | 100 |        |
|         | C3      | 16/4 | 100    |        | 100    |        | 100 |        | 100 |        |
|         | C4      | 20/5 | 96     | 84-100 | 100    |        | 100 |        | 100 |        |
|         | C5      | 20/5 | 91     | 77-100 | 89     | 56-100 | 96  | 76-100 | 100 |        |
|         | C6      | 20/5 | 96     | 88-100 | 97     | 89-100 | 100 |        | 100 |        |
|         | L1      | 20/5 | 41     | 0-89   | 44     | 0-81   | 100 |        | 100 |        |
|         | L2      | 20/5 | 61     | 0-96   | 100    |        | 100 |        | 100 |        |
|         | L3      | 20/5 | 63     | 0-95   | 92     | 81-99  | 95  | 73-100 | 100 |        |
|         | L4      | 20/5 | 3      | 0-86   | 100    |        | 100 |        | 100 |        |
|         | L5      | 20/5 | 0      | 0-64   | 90     | 73-100 | 100 |        | 100 |        |
|         | L6      | 20/5 | 69     | 33-100 | 100    |        | 100 |        | 100 |        |
|         | L7      | 16/4 | 94     | 79-100 | 100    |        | 100 |        | 100 |        |
|         | L8      | 16/4 | 100    |        | 100    |        | 100 |        | 100 |        |
|         | L9      | 12/4 |        |        | 100    |        | 100 |        | 100 |        |
|         | A1      | 20/5 | 83     | 34-100 | 100    |        | 46  | 0-100  | 100 |        |
|         | A2      | 16/4 | 100    |        | 100    |        | 100 |        | 100 |        |
|         | A3      | 16/4 | 93     | 67-100 | 91     | 69-100 | 100 |        | 100 |        |
|         | A4      | 16/4 | 100    |        | 95     | 84-100 | 100 |        | 100 |        |
|         | A5      | 16/4 | 100    |        | 96     | 86-100 | 100 |        | 100 |        |
|         | A6      | 16/4 | 98     | 92-100 | 97     | 91-100 | 100 |        | 100 |        |
|         | A7      | 16/4 | 100    |        | 97     | 89-100 | 100 |        | 100 |        |
|         | A8      | 16/4 | 86     | 48-100 | 63     | 0-100  | 100 |        | 100 |        |
|         | A9      | 16/4 | 100    |        | 37     | 0-96   | 100 |        | 100 |        |
|         | U1      | 16/4 | 100    |        | 100    |        | 100 |        | 100 |        |
|         | U2      | 12/4 |        |        | 100    |        | 100 |        | 100 |        |
|         | F1      | 20/5 | 56     | 0-99   | 60     | 0-93   | 100 |        | 100 |        |
|         | F2      | 20/5 | 74     | 0-100  | 100    |        | 100 |        | 100 |        |
|         | F3      | 20/5 | 48     | 0-94   | 71     | 31-100 | 100 |        | 100 |        |
|         | F4      | 16/4 | 77     | 59-91  | 83     | 64-95  | 100 |        | 100 |        |
|         | F5      | 16/4 | 69     | 0-96   | 87     | 76-98  | 100 |        | 100 |        |
|         | V1      | 16/4 | 83     | 44-100 | 97     | 84-100 | 100 |        | 100 |        |
|         | V2      | 12/4 |        |        | 95     | 52-100 | 94  | 68-100 | 100 |        |
|         | V3      | 12/4 |        |        | 76     | 15-100 | 100 |        | 100 |        |
|         | V4      | 12/4 |        |        | 88     | 12-100 | 100 |        | 100 |        |
|         | V5      | 12/4 |        |        | 90     | 71-100 | 100 |        | 100 |        |
|         | T1      | 16/4 | 32     | 0-91   | 38     | 0-100  | 100 |        | 100 |        |
|         | T2      | 16/4 | 86     | 41-100 | 83     | 46-100 | 100 |        | 100 |        |
| T3      | 16/4    | 100  |        | 98     | 94-100 | 100    |     | 100    |     |        |
| T4      | 16/4    | 97   | 73-100 | 70     | 0-100  | 100    |     | 100    |     |        |
| T5      | 16/4    | 100  |        | 78     | 54-100 | 100    |     | 100    |     |        |
| T6      | 16/4    | 99   | 93-100 | 100    |        | 100    |     | 100    |     |        |
| T7      | 16/4    | 89   | 54-100 | 90     | 60-100 | 100    |     | 100    |     |        |

Parasites & Vectors 2(Suppl 2): S2  
 Additional file 1 (cont)

| Country | Yard ID | H/G  | FBZ   | 95% CI | PYR | 95% CI | IVM | 95% CI | MOX | 95% CI |
|---------|---------|------|-------|--------|-----|--------|-----|--------|-----|--------|
| Italy   | T8      | 16/4 | 91    | 79-100 | 93  | 79-100 | 100 |        | 100 |        |
|         | T9      | 16/4 | 98    | 93-100 | 87  | 41-100 | 100 |        | 100 |        |
|         | T10     | 16/4 | 100   |        | 79  | 9-100  | 100 |        | 100 |        |
| UK      | 2       | 20/5 | 0     | 0-80   | 74  | 41-93  | 97  | 88-100 | 100 |        |
|         | 3       | 16/4 | 0     | 0-48   | 85  | 65-100 | 100 |        | 100 |        |
|         | 5       | 20/5 | 0     | 0-44   | 88  | 51-100 | 89  | 56-100 | 100 |        |
|         | 6       | 20/5 | 0     | 0-72   | 100 |        | 100 |        | 100 |        |
|         | 7       | 12/4 |       |        | 100 |        | 100 |        | 100 |        |
|         | 9       | 20/5 | 80    | 42-98  | 97  | 85-100 | 100 |        | 100 |        |
|         | 10      | 20/5 | 96    | 88-100 | 100 |        | 100 |        | 100 |        |
|         | 11      | 20/5 | 27    | 0-92   | 100 |        | 100 |        | 100 |        |
|         | 12      | 12/4 |       |        | 100 |        | 100 |        | 100 |        |
|         | 15      | 20/5 | 0     | 0-73   | 63  | 3-100  | 100 |        | 100 |        |
|         | 16      | 12/4 |       |        | 100 |        | 100 |        | 100 |        |
|         | 26      | 12/4 |       |        | 100 |        | 100 |        | 100 |        |
|         | 31      | 20/5 | 68    | 27-90  | 94  | 71-100 | 100 |        | 100 |        |
|         | 32      | 12/4 |       |        | 100 |        | 100 |        | 100 |        |
|         | 33      | 20/5 | 0     | 0-71   | 100 |        | 72  | 30-100 | 100 |        |
|         | 34      | 20/5 | 80    | 1-100  | 100 |        | 100 |        | 100 |        |
|         | 35      | 20/5 | 100   |        | 100 |        | 100 |        | 100 |        |
|         | 36      | 20/5 | 30    | 0-78   | 100 |        | 100 |        | 100 |        |
|         | 37      | 20/5 | 94    | 63-100 | 100 |        | 100 |        | 100 |        |
|         | 39      | 20/5 | 28    | 0-97   | 100 |        | 100 |        | 100 |        |
| 40      | 20/5    | 66   | 10-98 | 100    |     | 100    |     | 100    |     |        |
| 41      | 20/5    | 54   | 0-100 | 100    |     | 100    |     | 100    |     |        |
